# Supplementary material for: Early to Middle Miocene in the North Sea Basin: proxy-based insights into environment, depositional settings and sea surface temperature evolution
Source: Copernicus journal article supplement (doi:10.5194/jm-44-509-2025), 2025-11-10
Supplement: Supplementary file 1 [file Supplementary Data File_jm-2024-26.xlsx]

## Sheet: 1
Raw counts: Palynofacies counts and the P/D - Sønder Vium well
Core sample depths
top depth (m)	base depth (m)	analyst	GEUS Sample code	status	Non-Saccate pollen	Bissacate pollen	Spores	Fungal spores	Freshwater algaes	Acritarchs	Dinocysts	Unidentified palynomorphs	Total of Palynomorphs		P/D Index
43.08	43.12	LFK/1	16.483	Analysed	145	11	0	0	0	3	189	5	353		43.4132
51.38	51.42	LFK/1	16.654	Analysed	126	80	14	0	0	7	94	10	331		59.8291
53.48	53.52	LFK/1	16.658	Analysed	182	143	3	9	0	1	27	8	373		87.7828
73.98	74.02	LFK/1	16.826	Analysed	176	56	6	2	1	10	75	10	336		71.1538
87.98	88.02	LFK/1	16.834	Analysed	122	51	1	5	1	24	103	12	319		55.6034
95.38	95.42	LFK/1	16.839	Analysed	157	60	4	2	1	20	72	7	323		69.4915
112.63	112.67	LFK/1	16.844	Analysed	112	10	0	2	8	21	140	11	304		46.5649
119.03	119.07	LFK/1	16.846	Analysed	125	12	2	4	5	15	129	19	311		51.3208
133.28	133.32	LFK/1	16.856	Analysed	59	90	1	0	6	1	148	10	315		30.8411
146.63	146.67	LFK/1	16.916	Analysed	156	51	7	1	2	5	67	29	318		71.2446

## Sheet: 2
	Abundance (%) Palynofacies - Sønder Vium well
	Core sample depths
	top depth (m)	base depth (m)	analyst	GEUS Sample code	status	Non-Saccate pollen	Bissacate pollen	Spores	Fungal spores	Freshwater algaes	Acritarchs	Dinocysts	Unidentified palynomorphs
	43.08	43.12	LFK/1	16.483	Analysed	41.0765	3.11615	0	0	0	0.849858	53.5411	1.41643
	51.38	51.42	LFK/1	16.654	Analysed	38.0665	24.1692	4.22961	0	0	2.1148	28.3988	2.83286
	53.48	53.52	LFK/1	16.658	Analysed	48.7936	38.3378	0.80429	2.41287	0	0.268097	7.23861	2.26629
	73.98	74.02	LFK/1	16.826	Analysed	52.381	16.6667	1.78571	0.595238	0.297619	2.97619	22.3214	2.83286
	87.98	88.02	LFK/1	16.834	Analysed	38.2445	15.9875	0.31348	1.5674	0.31348	7.52351	32.2884	3.39943
	95.38	95.42	LFK/1	16.839	Analysed	48.6068	18.5759	1.23839	0.619195	0.309598	6.19195	22.291	1.983
	112.63	112.67	LFK/1	16.844	Analysed	36.8421	3.28947	0	0.657895	2.63158	6.90789	46.0526	3.11615
	119.03	119.07	LFK/1	16.846	Analysed	40.1929	3.85852	0.643087	1.28617	1.60772	4.82315	41.4791	5.38244
	133.28	133.32	LFK/1	16.856	Analysed	18.7302	28.5714	0.31746	0	1.90476	0.31746	46.9841	2.83286
	146.63	146.67	LFK/1	16.916	Analysed	49.0566	16.0377	2.20126	0.314465	0.628931	1.57233	21.0692	8.2153

## Sheet: 3
Raw counts dinocyst taxa - Sønder Vium well														DC - dinoflagellate cyst			RW -reworked			? - questionable		AC- Acritarch
Core sample depths
top depth (m)	base depth (m)	analyst	GEUS Sample code	total of dinocyst counted per sample	Achomosphaera+Spiniferites group	RW - Apectodinium spp.	RW - Apectodinium augustum	RW - Apectodinium quinquelatum	RW - Apectodinium cf. quinquelatum	Apteodinium spp.	RW - Areoligera gippingensis	RW - Areosphaeridium spp.	RW - Areosphaeridium arcuatum	Areosphaeridium diktyoplokum	Barssidinium spp.	Barssidinium graminosum	Barssidinium taxandrianum	Barssidinium wrennii	Batiacasphaera spp.	Batiacasphaera spp. ?	Batioladinium spp.	Bitectatodinium spp.	Bitectatodinium serratum ?	Bitectatodinium tepikiense	Cerebocysta satchelliae ?	Cerebrocysta spp.	Cerebrocysta poulsenii	Cerebrocysta poulsenii ?	RW - Cerodinium spp.	RW - Chatangiella spp.	RW - Chiropteridium spp.	RW - Chiropteridium galea	RW - Chiropteridium galea ?	RW - Chlamydophorella spp.	Cleistosphaeridium spp.	Cleistosphaeridium placacanthum	Cleistosphaeridium placacanthum ?	RW - Cordosphaeridium spp.	Cordosphaeridium cantharellus	Cousteaudinium aubryae	RW - Cribroperidinium granuligerum	Cribroperidinium tenuitabulatum	RW - Cyclonephelium spp.	Dapsilidinium spp.	RW - Dinopterygium cladoides	Dissiliodinium spp.	Distatodinium spp.	Distatodinium paradoxum	RW - Eatonicysta ursulae
					DC	DC	DC	DC	DC	DC	DC	DC	DC	DC	DC	DC	DC	DC	DC	DC	DC	DC	DC	DC	DC	DC	DC	DC	DC	DC	DC	DC	DC	DC	DC	DC	DC	DC	DC	DC	DC	DC	DC	DC	DC	DC	DC	DC	DC
24.04	24.08	SP/1	16.446	113	28							1				1
25.58	25.62	SP/1	16.449	264	68								1			1			1					1								1					1
29.01	29.14	SP/1	16.456	106	42																															1
31.08	31.12	SP/1	16.460	330	93					1							1																											1
36.6	36.64	SP/1	16.470	726	174											2																		1										16
40.08	40.12	SP/1	16.477	606	227											2		1					1				2																	28
41.08	41.12	SP/1	16.479	243	105											1			1				1																					15
42.58	42.62	SP/1	16.482	266	122										1																											1		12
43.08	43.12	LFK/1	16.483	212	95														1												1					6				1				20
44.08	44.12	SP/1	16,486	929	246																																							38
45.03	45.07	SP/1	16.642	290	124										2																										1			21
45.63	45.67	SP/1	16.643	852	295					26								2																										16
47.48	47.52	SP/1	16.647	628	352					12					2				2								4		1	2				2		20								6
49.08	49.12	SP/1	16.650	194	115					1									1								1									12								4
50.5	50.54	SP/1	16.653	273	112					10					1												2									1								8
51.38	51.42	LFK/1	16.654	206	83					3																	1									24								7	1			2
52	52.04	SP/1	16.656	248	107					53																								1		11		1				1		6
53.48	53.52	LFK/1	16.658	207	112					6									3																8									8
54.23	54.27	SP/1	16.659	666	335					86					2															2				2		14			2					6
59.48	59.52	SP/1	16.662	609	308	1				4					4				2						1				2							80		1		6			1	28
62.63	62.67	KD	16.663	844	245	2				26					4										2											190				6				14				2
67	67.4	KD	16.666	310	149	5				7					3			1		1							4			1						36				2				18
71.15	71.19	KD	16.823	267	76					76																1										30			1	1				10		6
73.98	74.02	LFK/1	16.826	204	55					25																										55		1		1				11				1
76.29	76.33	KD	16.827	192	40					83																1		1								29				4		1		3		2
81.26	81.3	KD	16.832	143	46					30																1										1								7		1
83.43	83.47	JMF/1	16.833	122	46					20																										1				2				10				+
87.98	88.02	LFK/1	16.834	205	58					39																										27				6				6
89.68	89.72	KD	16.835	116	34	1				33					1																					2				1		1		2
93.81	93.85	JMF/1	16.838	183	69					28																										8				1				9
95.38	95.42	LFK/1	16.839	209	66					42																										31								9
97.85	97.89	JMF/1	16.841	122	61					10																										4				+				7
110.73	110.77	JMF/1	16.842	184	34					21																										4			+	+				1
111.54	111.58	KD	16.843	191	77	1				15											1								1		1					11			4					6		1		4
112.63	112.67	LFK/1	16.844	205	58					18																										27				1				8				1
114.88	114.92	KD	16.845	187	45					17																1										9		1						5				1
119.03	119.07	LFK/1	16.846	200	66					9																					1					30								3				1
120.47	120.51	JMF/1	16.847	239	70					41												1														20			1					9				+
123.94	123.98	JMF/1	16.849	245	123		1			2												2														29			+					20				+
123.94	123.98	KD	16.849	264	87	1	1			17	1				1				3																	95			2					13				2
125.23	125.27	JMF/1	16.850	267	130					8																										34			+					19				5
128.48	128.52	KD	16.852	262	62	3				8									3																	47			3					15				5	1
130.98	131.02	SP/1	16.854	276	66	2				16									1																	35			2					11				4
131.43	131.47	JMF/1	16.885	262	98					8												5														17	2		+					9				2
133.28	133.32	LFK/1	16.856	260	85					9									1																	49								17				1
134.73	134.77	JMF/1	16.857	97	25					2												1														7	2		+					9				1
136.08	136.12	JMF/1	16.858	212	92					3												1														31			+					20				5
138.78	138.82	KD	16.860	237	81			1		4																										49			5					17	1			9
143.48	143.52	KD	16.863	233	78	1		1		3	1			1																						63			3					16				13
146.63	146.67	LFK/1	16.916	215	58					2									4																	35								10			3	3
149.48	149.52	KD	16.918	116	33					15																						1				25			4									1
150.6	150.64	KD	16.919	152	54					4																										45			2					1				3
152.88	152.92	JMF/1	19.921	0	+					+																										+
158.78	158.82	KD	16.924	147	28			1		29																										36			5					6
	160	KD		67	38																															8								2				2
	184	KD		70	26					8																										12			1					5
	190	KD		45	21					5																										8								2				1
194.88	194.92	KD	16.925	36	16					3																										2			1					2
201.73	201.77	KD	16.930	119	45				1	3																										17			1					6
213.98	214.02	KD	16.938	75	35					1																										12			1					4
226.48	226.52	KD	16.946	204	83					3	1																									37			1					13
237.98	238.02	KD	16.954	54	19					1																										9								7				1
246.98	247.02	KD	16.982	62	32					2																										13								3
260.28	260.32	KD	16.991	238	109					1	1																						1			22			2					33				2
267.98	268.02	KD	16.996	82	33					2																							1			18								7
277.98	278.02	KD	17.003	75	38					2																										6								7				1
286.63	286.67	KD	17.011	275	82					9									1																	15			2					36				7
[truncated: 105 more columns]

## Sheet: 4
	Raw counts: palynofacies counts and the P/D index - 2/11-12S well
Samples depths (unshifted core-depths)	Base of sample interval (log-depth, m)	analyst	Acritarchs	Bisaccate pollen	Dinocysts	Non-saccate pollen	Unidentified palynomorphs	Spores	Other marine algae	Freshwater algae			P/D index
1485.04 - 1485.13m	1486.78	KD/1	2		348		5						0
1487.27 - 1487.39m	1489.04	KD/1		2	298	3	19						0.996678
1491.61 - 1491.74m	1493.39	KD/1	1	8	294	4	23						1.34228
1496.58 - 1496.69m	1498.34	KD/1	1	2	305	9	14						2.86624
1500.43 - 1500.54m	1502.19	KD/1	1	3	325	4	18						1.21581
1504.50 - 1504.60m	1506.25	KD/1	5	19	267	19	27						6.64336
1506.81 - 1506.91m	1508.56	KD/1
1509.56 - 1509.66m	1511.31	KD/1	6	20	216	28	58						11.4754
1514.06 - 1514.15m	1515.80	KD/1	5	15	242	23	39	1					9.02256
1518.65 - 1518.75m	1517.80	KD/1	4	11	259	13	32						4.77941
1522.35 - 1522.46m	1521.51	KD/1	1	6	240	9	58						3.61446
1526.68 - 1526.75m	1525.80	KD/1	2	5	318	16	53						4.79042
1533.42 - 1533.51m	1532.56	KD/1	2	7	259	5	31		1				1.89394
1542.75 - 1542.84m	1541.89	KD/1	8	9	282	14	44						4.72973
1549.75 - 1549.83m	1548.88	KD/1	15	21	226	27	40		1				10.6719
1552.20 - 1552.29m	1551.29	KD/1		16	206	22	68	1					10.0437
1562.30 - 1562.39m	1561.39	KD/1	3	18	228	20	49	2		3			9.88142
1571.80 - 1571.90m	1570.90	KD/1	1	11	247	34	33	1					12.4113
1579.42 - 1579.51m	1579.11	KD/1	10	11	239	38	17						13.7184
1584.77 - 1584.85m	1584.45	KD/1	28	20	201	31	37						13.3621
1586.51 - 1586.61m	1586.21	KD/1	4	13	181	72	44	1					28.7402
1595.40 - 1595.48m	1595.08	KD/1	1	24	261	17	12	1					6.45161
1600.41 - 1600.47m	1600.07	KD/1	3	37	239	24	22						9.12548
1602.35 - 1602.42m	1602.02	KD/1	1	31	237	22	25	1					8.84615
1606.47 - 1606.54m	1606.14	KD/1	3	15	255	27	31						9.57447
1608.73 - 1608.84m	1608.44	KD/1	1	32	186	65	33						25.8964
1613.72 - 1613.80m	1613.00	KD/1	2	26	194	47	41	1					19.8347
1617.57 - 1617.66m	1616.86	KD/1	5	24	187	60	43	1					24.5968
1622.37 - 1622.46m	1621.66	KD/1	4	40	183	55	35						23.1092
1628.50 - 1628.57m	1627.77	KD/1	4	15	227	38	35			1			14.6617
1634.35 - 1634.41m	1633.61	KD/1	1	21	271	36	21	1					12.013
1636.30 - 1636.37m	1635.57	KD/1	2	46	195	37	41	1					16.309
1641.37 - 1641.45m	1640.65	KD/1	4	19	290	28	22	2					9.375
1646.29 - 1646.33m	1645.53	KD/1	5	31	205	40	44	1					16.6667
1653.53 - 1653.61m	1652.76	KD/1	26	62	137	45	42		1				24.7253
1655.50 - 1655.57m	1654.72	KD/1	21	45	186	28	30	1					13.4884
1660.52 - 1660.54m	1659.69	KD/1		29	261	15	21	3					6.45161
1664.63 - 1664.69m	1663.84	KD/1	2	49	143	66	46	4					32.8638
1668.51 - 1668.55m	1667.70	KD/1	10	91	362	74	75	1					17.1625
1672.01 - 1671.22m	1671.22	KD/1	6	69	175	28	27						13.7931

## Sheet: 5
Abundance (%) Palynofacies - 2/11-12S well
Samples depths (unshifted core-depths)	Base of sample interval (log-depth, m)	analyst	Acritarchs	Bisaccate pollen	Dinocysts	Non-saccate pollen	Unidentified palynomorphs	Spores	Other marine algae	Freshwater algae
1485.04 - 1485.13m	1486.78	KD/1	.56		98		1
1487.27 - 1487.39m	1489.04	KD/1		0.62	93	1	6
1491.61 - 1491.74m	1493.39	KD/1	0.3	2	89	1	7
1496.58 - 1496.69m	1498.34	KD/1	0.3	0.6	92	3	4
1500.43 - 1500.54m	1502.19	KD/1	0.28	0.85	93	1	5
1504.50 - 1504.60m	1506.25	KD/1	1	6	79	6	8
1506.81 - 1506.91m	1508.56	KD/1
1509.56 - 1509.66m	1511.31	KD/1	2	6	66	9	18
1514.06 - 1514.15m	1515.80	KD/1	2	5	74	7	12	0.31
1518.65 - 1518.75m	1517.80	KD/1	1	3	81	4	10
1522.35 - 1522.46m	1521.51	KD/1	0.32	2	76	3	18
1526.68 - 1526.75m	1525.80	KD/1	0.51	1	81	4	13
1533.42 - 1533.51m	1532.56	KD/1	0.66	2	85	2	10			0.33
1542.75 - 1542.84m	1541.89	KD/1	2	3	79	4	12
1549.75 - 1549.83m	1548.88	KD/1	5	6	68	8	12	0.3
1552.20 - 1552.29m	1551.29	KD/1		5	66	7	22	0.32
1562.30 - 1562.39m	1561.39	KD/1	0.93	6	71	6	15	0.62		0.93
1571.80 - 1571.90m	1570.90	KD/1	0.31	3	76	10	10	0.31
1579.42 - 1579.51m	1579.11	KD/1	3	3	76	12	5
1584.77 - 1584.85m	1584.45	KD/1	9	6	63	10	12
1586.51 - 1586.61m	1586.21	KD/1	1	4	57	23	14	0.32
1595.40 - 1595.48m	1595.08	KD/1	0.32	8	83	5	4	0.32
1600.41 - 1600.47m	1600.07	KD/1	0.92	11	74	7	7
1602.35 - 1602.42m	1602.02	KD/1	0.32	10	75	7	8	0.32
1606.47 - 1606.54m	1606.14	KD/1	0.91	5	77	8	9
1608.73 - 1608.84m	1608.44	KD/1	0.32	10	59	21	10
1613.72 - 1613.80m	1613.00	KD/1	0.64	8	62	15	13	0.32
1617.57 - 1617.66m	1616.86	KD/1	2	8	58	19	13	0.31
1622.37 - 1622.46m	1621.66	KD/1	1	13	58	17	11
1628.50 - 1628.57m	1627.77	KD/1	1	5	71	12	11			0.31
1634.35 - 1634.41m	1633.61	KD/1	0.28	6	77	10	6	0.28
1636.30 - 1636.37m	1635.57	KD/1	0.62	14	61	11	13	0.31
1641.37 - 1641.45m	1640.65	KD/1	1	5	79	8	6	0.55
1646.29 - 1646.33m	1645.53	KD/1	2	10	63	12	13	0.31
1653.53 - 1653.61m	1652.76	KD/1	8	20	44	14	13		0.32
1655.50 - 1655.57m	1654.72	KD/1	7	14	60	9	10	0.32
1660.52 - 1660.54m	1659.69	KD/1		9	79	5	6	0.91
1664.63 - 1664.69m	1663.84	KD/1	0.65	16	46	21	15	1
1668.51 - 1668.55m	1667.70	KD/1	2	15	59	12	12	0.16
1672.01 - 1671.22m	1671.22	KD/1	2	23	57	9	9

## Sheet: 6
Raw counts Dinocyst taxa - 2/11-12S well																		DC - dinoflagellate cyst			RW -reworked		? - questionable
Samples depths (unshifted core-depths)	Base of sample interval (log-depth, m)	analyst	DC Dapsilidinium pseudocolligerum	DC Heteraulacacysta campanula	DC Hystrichokolpoma rigaudiae	DC Impagidinium velorum	DC Lingulodinium machaerophorum	DC Melitasphaeridium choanophorum	DC Small dinocysts undff.	DC Nematosphaeropsis labyrinthus	DC Operculodinium centrocarpum	DC Operculodinium cf. piaseckii	DC Operculodinium piaseckii	DC Thalassiphora rota	DC Palaeocystodinium golzowense	DC Pentadinium laticinctum imaginatum	DC Pentadinium laticinctum laticinctum	DC Polysphaeridium zoharyi	DC Reticulatosphaera actinocoronata	DC Spiniferites pseudofurcatus	DC Spiniferites solidago	DC Spiniferites spp.	DC Invertocysta lacrymosa	DC Achomosphaera ramulifera	DC Palaeocystodinium powellense	DC Gramocysta verricula	DC Achomosphaera andalousiensis andalousiensis	DC Habibacysta tectata	DC Operculodinium eirikianum	DC Impagidinium patulum	DC cf. Bitectatodinium spp.	DC Achomosphaera alcicornu	DC Labyrinthodinium truncatum	DC Palaeocystodinium miocaenicum/minor	DC Cerebrocysta poulsenii	DC Impagidinium aculeatum	DC Pyxidinopsis psilata	DC Hystrichosphaeropsis obscura	DC Hystrichosphaeropsis cf. obscura	DC Impagidinium paradoxum	DC Batiacasphaera spp.	DC Nematosphaeropsis lemniscata	DC Tectatodinium pellitum	DC Heteraulacacysta spp.	DC Cannosphaeropsis passio	DC Invertocysta tabulata	DC Achomosphaera sp.	DC Apteodinium cf. australiense	DC Operculodinium sp.
1485.04 - 1485.13m	1486.78	KD/1	4	1	1	1	12	1	15	2	62		2		1	1	1	1	1	8	8	53	3	1	3	11	1	13	5	1	4	1	19	1?	2	2	5	3		3	1	1
1487.27 - 1487.39m	1489.04	KD/1	11			1	5	3	10	3	25		3				1		1	2	1	68	2	1	1		2	5	5		1		30		5	6	5	1		5	3	10	1	1	7	2	2
1491.61 - 1491.74m	1493.39	KD/1	5	1	1	1	3	2	4	3	33		4				1			1		50	1		1			10	7		2		34		2	5	7			7	10	3	3		5	1		1	1
1496.58 - 1496.69m	1498.34	KD/1			14	1	21		12		36		2				2		1	1	2	45			2			9	1		2				3	1 ?	1	3			6	3	1			3
1500.43 - 1500.54m	1502.19	KD/1	1		4		9	1	23	1	21		1				2		1	2	1	79		1	2			7	9		1		10	6	2			2			5	3	2			2
1504.50 - 1504.60m	1506.25	KD/1	4		10		12	2	19	1	18		2				2			4	3	46			2			7	11		2	1	7	21	5		7	1			13	2	11			2
1506.81 - 1506.91m	1508.56	KD/1	2	2	3		6	3	43	1	21						1		2	2	2	51			3			9	2		1		8	28	7		8	1			21	3	5			1			1
1509.56 - 1509.66m	1511.31	KD/1		10	1		15	1	24		14								1	1	1	69			2			4			1		2	17	2		2	1			3	3	2			2 ?
1514.06 - 1514.15m	1515.80	KD/1	7	4	3		9	2	16		17		1				1		2		2	74						6			3		7	21	3		2	1			1	2	1						1
1518.65 - 1518.75m	1517.80	KD/1	2	3	2		4	2	30		13		2				2			1	1	46						2					3	58	4		2	1			8	2	3					2
1522.35 - 1522.46m	1521.51	KD/1			3		2		6		48		2				3			1		86											2	20	3		5	1					1						1
1526.68 - 1526.75m	1525.80	KD/1	1	3	3		7	5	32		11		1				2		2	2	1	52					1 ?	2				1	7	36	2	1	4				4	2				1		2	1
1533.42 - 1533.51m	1532.56	KD/1	1		3		8	8	9	1	24		1			1	2			1	4	81									1		6	17	4		5				3		3					1
1542.75 - 1542.84m	1541.89	KD/1		1	10		12	10	14		26		1							1	2	96									2		3	11	1		2	1
1549.75 - 1549.83m	1548.88	KD/1	2	2	2	1	3	2	5	1	7		1				1		1	1	1	39									4		4	69	2	1	8	1		1	14	2	2			1		2	1
1552.20 - 1552.29m	1551.29	KD/1	7	5	1		1	1	16		31		1				1			7		54									1		1 ?	63	10						1	1				3			1
1562.30 - 1562.39m	1561.39	KD/1	2	2	2	1	9	25	12		16		5				2	2	1	3	1	70							1		4		7	6	13	1	2				7	2	1			1		3	1
1571.80 - 1571.90m	1570.90	KD/1	5	3	3	2	16	5	3		27		6				2			2	2	61											9	9	2		2	2			8	8	2			1		2	2
1579.42 - 1579.51m	1579.11	KD/1	1	5	2		7	2	3		18		2				2	4	3	1	1	59								2			6	43	1	2	4	2			19	3				1		3
1584.77 - 1584.85m	1584.45	KD/1	2	1	2	1	6	3	1	1	19		1		1		1	1	3	3	2	62									2		5	57	2			1			5	3	1			1		1	1
1586.51 - 1586.61m	1586.21	KD/1	2	4	2		7	2	12	2	21		2		4		2	3	1	1	1	71									2		6	26	1	1		1				4							1
1595.40 - 1595.48m	1595.08	KD/1	1	2	1		29	2	4	1	19		2		10		4	1	4	6	5	80											1	2	2	1	1	2			7	3	1			1
1600.41 - 1600.47m	1600.07	KD/1	2	5	2		10	6	3		41		2		8		1	6	4	5		56									1 ?		2	2			1	1			7	2				2			2
1602.35 - 1602.42m	1602.02	KD/1	6	7	2		15	4	1		23		3		12		4	2	3	3	3	47										1	4	3	2			2		2	4	5	1				1 ?
1606.47 - 1606.54m	1606.14	KD/1	2	8			16	5	10		35		2		9		2	2	1	4		58											3	2			1	2		1	2	7	2
1608.73 - 1608.84m	1608.44	KD/1	3	5	2	2	22	2	3	2	30		3		14	1	3	1	2	4	3	56												2		1		2		2	1	2	3					1	1
1613.72 - 1613.80m	1613.00	KD/1	4	2	2		13	15	8		32		3		20		2	11	3	2	5	67																				3	3						1
1617.57 - 1617.66m	1616.86	KD/1	9	6	1	1	18	13	22		16		2		3		1	2	2	1	2	57													3			2		1	1	4	3
1622.37 - 1622.46m	1621.66	KD/1	2	9			9	2	1	1	18		1		7				6	3	1	39															2				1	2	1					2
1628.50 - 1628.57m	1627.77	KD/1	4	2	1		17	5	9		24		3		2				2	1	5	87													2			2			1	2	3					1
1634.35 - 1634.41m	1633.61	KD/1	3	10		1	13	5	4	1	20		3		4		1	3	2	1	6	49														2	1	2			1	5	4					1	3
1636.30 - 1636.37m	1635.57	KD/1	5	7	1		14	4	10	1	13		2		4			1	2	2	3	67																1		5	2	5	3					1	1
1641.37 - 1641.45m	1640.65	KD/1	3	20	7		7	5	8	1	18				4		1		3	1	4	45																2		1	2	1						4	1
1646.29 - 1646.33m	1645.53	KD/1		19	3		7	4	4	1	13		1		6				2	1	1	50																				1						1
1653.53 - 1653.61m	1652.76	KD/1	1	5	1		3	1	5	2	12		2		8		1		5	3	2	78																				3						1	2
1655.50 - 1655.57m	1654.72	KD/1	1	8	2	1	6	2	2		15		3		12		3	1	4	2	2	47																		1		11						4	2
1660.52 - 1660.54m	1659.69	KD/1	1	10	7	1	5	2	3	1	31				3			2	2	4	2	52																			1	1						38	3
1664.63 - 1664.69m	1663.84	KD/1	2	5	6	1	10	3	5	1	24				5			4	6	2	1	39																				2						1	1
1668.51 - 1668.55m	1667.70	KD/1	1	2	9	1	11	2	5		38				2		1	5	13	2	1	46																					1					2	1
1672.16 - 1671.22m	1671.22	KD/1		14	6	1	11	9	3	3	37	2		3	5	1	2		1	3		38																	2										9
[truncated: 32 more columns]

## Sheet: 7
	GDGts Indexes- 2/11-12S well
					GDGT-0	GDGT-1	GDGT-2	GDGT-3	Cren	Cren'	brGDGT-IIIa	brGDGT-IIIa'	brGDGT-IIIb	brGDGT-IIIb'	brGDGT-IIIc	brGDGT-IIIc'	brGDGT-IIa	brGDGT-IIa'	brGDGT-IIb	brGDGT-IIb'	brGDGT-IIc	brGDGT-IIc'	brGDGT-Ia	brGDGT-Ib	brGDGT-Ic
	Sample depth	sample depth bottom	GEUS Sample code	LCMS ID	Area 1302	Area 1300	Area 1298	Area 1296	Area 1292	Area 1292'	Area 1050	area 1050'	area 1048	area 1048'	area 1046	area 1046'	Area 1036	area 1036'	area 1034	area 1034'	area 1032	area 1032'	Area 1022	Area 1020	Area 1018	TEX86	SST (TEX86H)	TEX86H	BIT	MI	GDGT2/3	%GDGT-0	RI	RITEX	∆RI	fCren′:Cren′ + Cren
	1672	1672.07	Prove 1	LC24090035	462467	78601	35820		348204																	0.313054	4.1004	-0.50438	0	0.24733	#DIV/0!	57.0474	1.668	1.67432	0.00631446	0
	1664.63	1664.69	Prove 3	LC24090046	5243176	801677	409369	193013	5663764	222719													117035			0.5072	18.4342	-0.294821	0.0202455	0.192586	2.12094	48.0719	2.05409	2.05353	-0.000559266	0.0378357
	1653.72	1653.8	Prove 6	LC24090047	3446712	537931	379755	155628	4251865	255464													425388			0.595169	23.1854	-0.22536	0.0909483	0.192328	2.44015	44.7708	2.19263	2.30775	0.11512	0.0566775
	1636.3	1636.37	Prove 10	LC24090048	9363325	2132640	1503621	758059	10792253	698483													957955			0.581244	22.4821	-0.235641	0.0815266	0.276632	1.98351	46.4553	2.11408	2.26409	0.150011	0.0607866
	1601.54	1601.63	Prove22	LC24090049	21465322	3913061	2478577	1230505	27345380	1301252							197711	72134	60546	58898			978024	90510	47327	0.561483	21.4546	-0.250663	0.0412233	0.210157	2.01428	43.9767	2.20231	2.20433	0.00202368	0.0454243
	1509.56	1509.66	Prove 48	LC24090050	15547134	2019429	995165	315722	14845465	548469							103422	47494					479568	48501		0.479366	16.7576	-0.319333	0.0377867	0.177861	3.15203	51.1543	1.94135	1.9838	0.0424484	0.0356289
	1491.61	1491.74	Prove 53	LC24090051	16918240	2238975	988181	278614	15856911	530948							115007	110983	77415	142867			382410	78420		0.445348	14.571	-0.351301	0.030415	0.176226	3.54677	51.6191	1.91793	1.90555	-0.0123777	0.0323989
																														no input of methanotrophic Archaea		not influenced by methanogenic GDGTs
