# Supplementary material for: Early to Middle Miocene in the North Sea Basin: proxy-based insights into environment, depositional settings and sea surface temperature evolution
Source: Copernicus journal article supplement (doi:10.5194/jm-44-509-2025), 2025-11-10
Supplement: Supplementary file [file jm-44-509-2025-supplement-title-page.pdf › jm-44-509-2025-supplement-title-page.pdf]

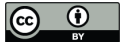

*Supplement of*

**Early to Middle Miocene in the North Sea Basin: proxy-based insights into environment, depositional settings and sea surface temperature evolution**

**Laura Kellner et al.**

*Correspondence to:* Kasia K. Śliwińska (kksl@geus.dk)

- jm-44-509-2025-supplement-title-page.pdf
- Supplementary Data File\_Kellner\_jm-2024-26
  - Supplementary Data File\_jm-2024-26.xlsx

The copyright of individual parts of the supplement might differ from the article licence.
